# Supplementary material
Source: PubMed Central journal article supplement (PMC3435543)
Supplement: supp_M027557_jlr.M027557-1.pdf [file supp_M027557_jlr.M027557-1.pdf]

## Supplemental Materials

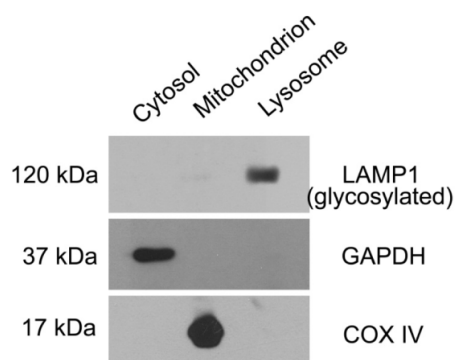

Figure S1

**Figure S1. Immunoblotting analysis of isolated lysosomes.** Lysosomes were isolated from rat livers, and each batch of lysosomes was subjected to immunoblotting analysis of LAMP1 (lysosomal marker), COX IV (mitochondrial marker) and GAPDH (cytosolic marker). Only lysosomes without detectable COX IV and GAPDH contaminations were used in the following experiments.
